# Supplementary material for: SERS spectral evolution of azo-reactions mediated by plasmonic Au@Ag core–shell nanorods
Source: Royal Society of Chemistry journal article supplement (doi:10.1039/d2na00486k), 2022-01-01
Supplement: d2na00486k1.pdf [file d2na00486k1.pdf]

## Supporting Information

### **SERS spectral evolution of azo-reactions mediated by plasmonic**

### **Au@Ag core-shell nanorods**

Mengen Hu,<sup>a,b</sup> Zhulin Huang,<sup>\*a,b</sup> Rui Liu,<sup>a,c</sup> Ningning Zhou,<sup>c</sup> Haibin Tang,<sup>\*a,b</sup> and Guowen Meng,<sup>a,b</sup>

<sup>a</sup> *Key Laboratory of Materials Physics and Anhui Key Laboratory of Nanomaterials and Nanotechnology, Institute of Solid State Physics, HFIPS, Chinese Academy of Sciences, Hefei, 230031, China*

<sup>b</sup> *University of Science and Technology of China, Hefei, 230026, China*

<sup>c</sup> *Department of Chemical and Materials Engineering, Hefei University, Hefei 230601, China.*

*\* Corresponding authors.*

*Email addresses: zlhuang@issp.ac.cn (Z. Huang), hbtang@issp.ac.cn (B. Tang)*

### Stability experiments of Au @ Ag core-shell nanorods

The stability experiment of Au @ Ag core-shell nanorods stored at 4 °C for 1 year were measured by UV-Vis-NIR absorption and SERS spectrum after adsorbing PATP.

Raman spectrum measurement method is the same as the text.

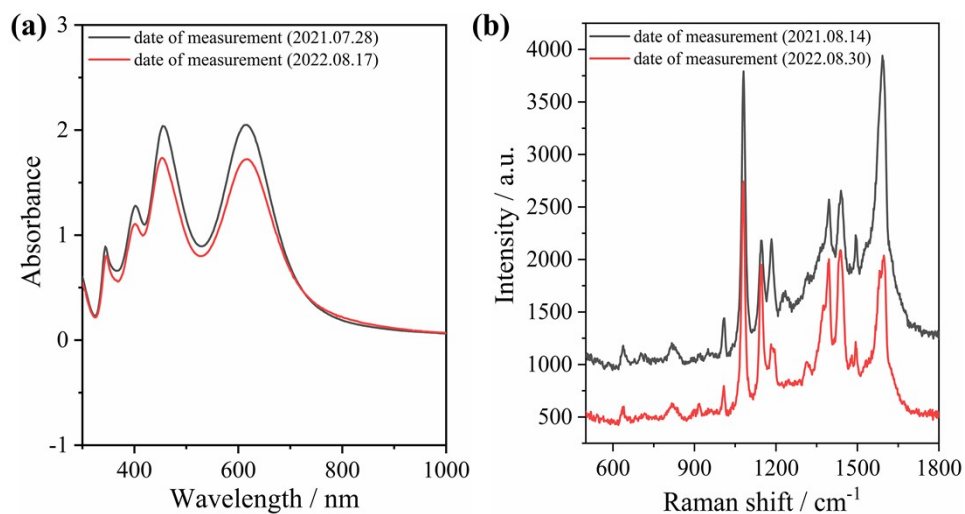

**Fig. S1** The (a) UV-Vis-NIR absorbance spectra and (b) SERS spectra of PATP under 633 nm excitation light of the Au@Ag core-shell nanorods after 1 year of storage.

The conversion of PATP catalyzed by Au nanorods and Au@Ag core-shell nanorods with different aspect ratios.

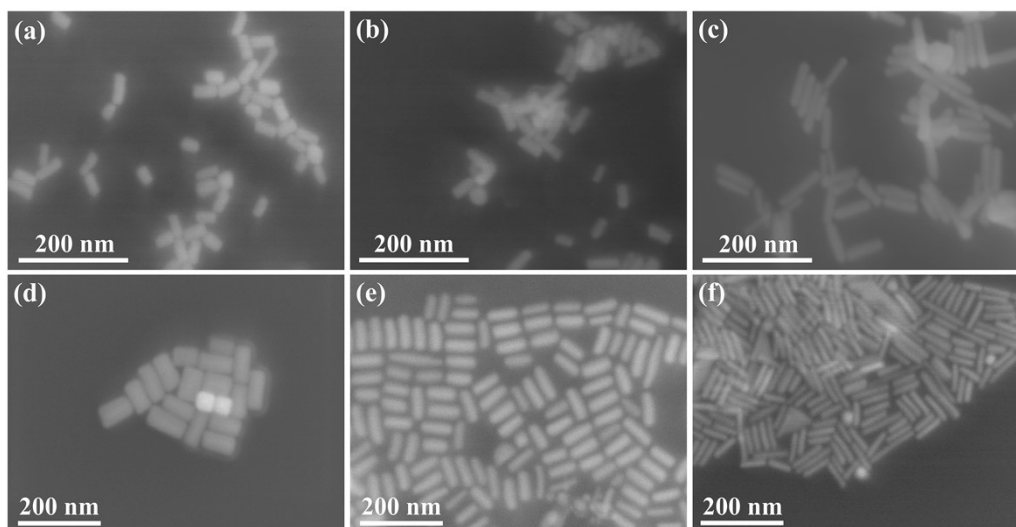

**Fig. S2** Au nanorods with different aspect ratios (a) 2.2, (b) 2.8, and (c) 4.2. Au@Ag core-shell nanorods with different aspect ratios (d) 1.8, (e) 2.7, and (f) 3.9.

**Table S1** plasmon peaks of Au nanorods and Au@Ag core-shell nanorods with different aspect ratios.

|              | AuNR   | AuNR   | AuNR   | Au@AgNR | Au@AgNR | Au@AgNR |
|--------------|--------|--------|--------|---------|---------|---------|
| aspect ratio | 2.2    | 2.8    | 4.2    | 1.8     | 2.7     | 3.9     |
| Plasmon peak | 600 nm | 650 nm | 852 nm | 615 nm  | 660 nm  | 822 nm  |

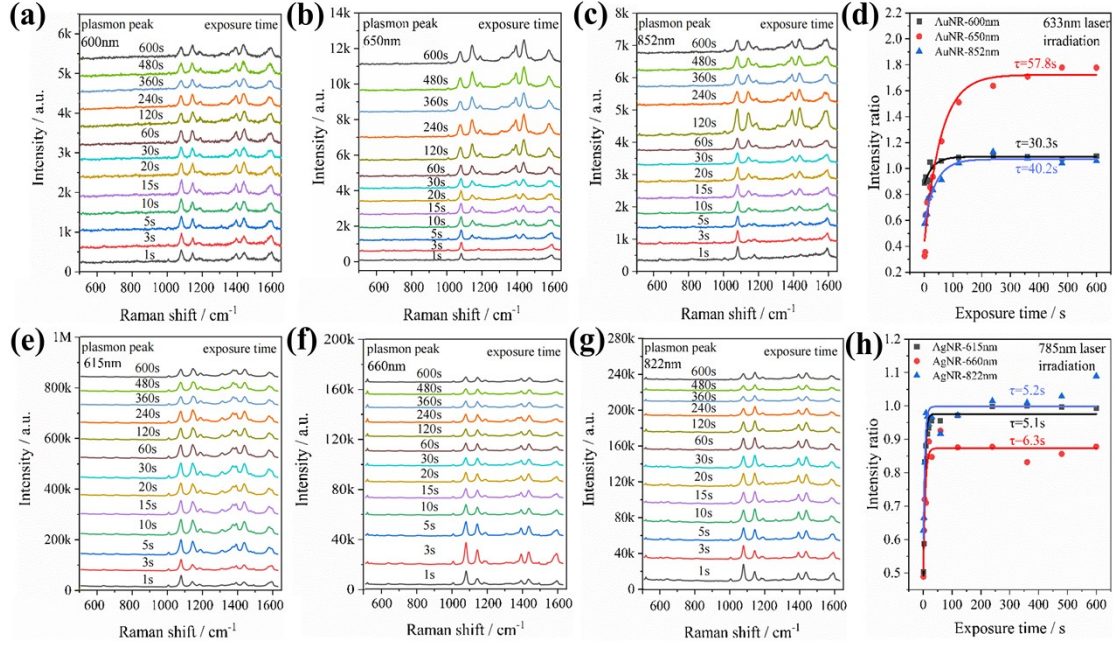

**Fig. S3** (a)-(c) Time-dependent SERS spectra of PATP adsorbed on Au nanorods and irradiated with 633 nm monochromatic light. (e)-(g) Time-dependent SERS spectra of PATP adsorbed on Au@Ag core-shell nanorods and irradiated with 785 nm monochromatic light. The variations of peak intensities at 1080  $\text{cm}^{-1}$  and 1440  $\text{cm}^{-1}$  with increasing irradiation time for (d) Au nanorods, (h) Au@Ag core-shell nanorods.

### The effect of laser power on Au@Ag core-shell nanorod plasma-driven photocatalysis.

We investigated the plasmon-driven photocatalysis of PATP with Au@Ag core-shell nanorods under different laser power excitation conditions with 633 nm excitation light. The sample was irradiated for 3 s at each power condition and 5 points were randomly selected for measurement, and the Raman intensities were averaged.

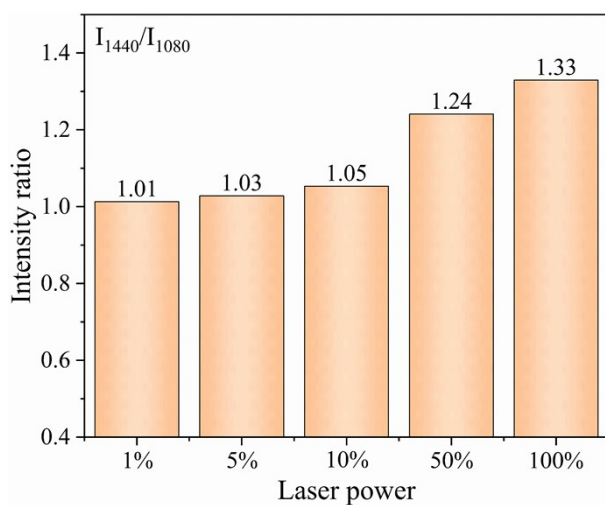

**Fig. S4** The conversion rates of PATP under the different power of 633 nm excitation light.

### Calculation of the reaction rate constant

The reaction rate constant  $k_I$  can be determined by eqn (1).

$$k_I = \ln(c_0/c_t) \quad (1)$$

$c_0$  and  $c_t$  are the concentrations of the reactants at the start and at time  $t$ , respectively.

The relationship between SERS intensity and probe concentration can be determined by equation (2).

$$I_{SERS} = k \times c \quad (2)$$

Here,  $c$  is the concentration of the probe and  $k$  is the constant of the substance.

Therefore, the expression to obtain  $k_I$  is shown in eqn (3).

$$k_I = \ln[(I_{1440}/I_{1080})_0/(I_{1440}/I_{1080})_t] \quad (3)$$
